# Supplementary material for: A metadata-aware application for remote scoring and exchange of tissue microarray images
Source: Springer Nature journal article supplement (doi:10.1186/1471-2105-14-147), 2013-05-01

User  
Construct TMA and  
Create EXCEL map

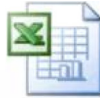

1. Transform to  
XML slidemap

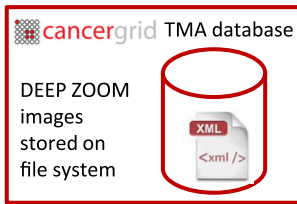

2. Import slidemap

ARIOL server

SQL Server

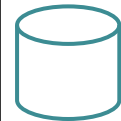

ARIOL WEB  
SERVICE

4. Export  
images+  
metadata

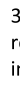

3. Accept  
requests for  
images

JPEG images

5. Rename images

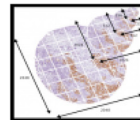

Batch Deep Zoom  
Converter program

7. Export scores

6. Manual on-line scoring

cancergrid

ABC30\_01\_076, p53

score

score:  
none  
0  
1  
2

comment:  
0

submit

User  
Image Scorer

User

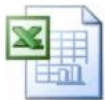

Supplement: 12859_2013_5880_MOESM3_ESM.pdf [file 12859_2013_5880_MOESM3_ESM.pdf]
